# Supplementary material for: Development of an evidence-based framework of factors contributing to patient safety incidents in hospital settings: a systematic review
Source: PubMed Central journal article supplement — BMJ Qual Saf. 2012 Mar 15;21(5):369–80. doi: 10.1136/bmjqs-2011-000443 (PMC3332004; doi:10.1136/bmjqs-2011-000443), 2012-03-15
Supplement: qhc-2011-000443-s1.pdf [file qhc-2011-000443-s1.pdf]

## **Appendices**

### **Appendix 1          Further details of search strategy**

#### 1. Electronic database search terms

##### Search terms

1. latent cause\*
2. latent error\*
3. latent failure\*
4. latent factor
5. latent factors
6. latent threat\*
7. system factor
8. system factors
9. systems factor
10. systems factors
11. system weakness\*
12. systems weakness\*
13. system error\*
14. systems error\*
15. system failure\*
16. systems failure\*
17. system cause\*
18. systems cause\*
19. potential error\*
20. potential failure\*
21. organi\*ation\* failure\*
22. organi\*ation\* factor
23. organi\*ation\* factors

24. workplace factors
25. contributory factor\*
26. error management
27. system safety
28. systems safety
29. violation
30. active failure
31. unsafe act\*
32. adverse event
33. near miss
34. human error
35. patient safety incident
36. safety
37. (health\* or medic\* or operati\* or hospital or patient)
38. 29 or 30 or 31 or 32 or 33 or 34 or 35 or 36
39. 1 or 2 or 3 or 4 or 5 or 6 or 7 or 8 or 9 or 10 or 11 or 12 or 13 or 14 or 15 or 16 or 17 or 18 or 19 or 20 or 21 or 22 or 23 or 24 or 25 or 26 or 27 or 28
40. 37 and 38 and 39

NB \* refers to truncated term

## 2, Patient safety organisation websites

Websites searched as follows to 20<sup>th</sup> Nov 2010: Agency for Healthcare Research and Quality: [www.ahrq.gov](http://www.ahrq.gov); Australian Patient Safety Foundation: <http://www.apsf.net.au/>; Canadian Patient Safety Institute: <http://www.patientsafetyinstitute.ca/English/Pages/default.aspx>; Danish Society for Patient Safety: <http://www.patientsikkerhed.dk/>; European Union Network for Patient Safety: <http://90plan.ovh.net/~extranet/>; Manchester Patient Safety Network (UK): <http://www.ihs.manchester.ac.uk/ResearchNetworks/patientsafety/>; Lancaster Patient Safety Research Unit (UK): <http://www.lpsru.org.uk/>; Scottish Patient Safety Network (UK): <http://www.spsrn.ac.uk/>; VA National Center for Patient Safety: <http://www.patientsafety.gov/>

### 3. Study databases

Study databases searched were: Action medical register (UK); Australian New Zealand clinical trials registry; Chinese clinical trials registry; German clinical trials registry; ICRCTN international register; Iranian clinical trials registry; Japan clinical trials registry; Medical Research Council (UK); Netherlands trials register;

NIH clinical trials (international); NIH Health Technology Assessment (UK); Pan African clinical trials registry;

Sri Lankan clinical trials registry; US clinical trials registry; Wellcome Trust (UK).

**Appendix Table 1 Summary of data extracted from included studies: incident reporting studies**

| Study                                        | Country   | Setting                                                                                                     | Study method       | Study sample                                  | Use of theory | Identification main aim? | Human factors expert? | Patients or staff reporting | Contributory factor list fully developed before data collected? | Method for eliciting contributory factors (if different from study method)                                          | Further details about contributory factor elicitation |
|----------------------------------------------|-----------|-------------------------------------------------------------------------------------------------------------|--------------------|-----------------------------------------------|---------------|--------------------------|-----------------------|-----------------------------|-----------------------------------------------------------------|---------------------------------------------------------------------------------------------------------------------|-------------------------------------------------------|
| Abramson et al (1980) <sup>1</sup>           | UK        | Intensive care: 16 bed general medical surgical ICU in 560 bed, adult, tertiary referral teaching hospital. | Incident reporting | 145 incident reported filed between 1974-1978 | None          | Secondary aim            | No                    | Staff                       | Yes                                                             | The way in which contributory factors were elicited for inclusion on the incident reporting form was not specified. | N/A                                                   |
| Beckmann & Gillies (2001) <sup>2</sup>       | Australia | Intensive care: up to 93 Intensive care units                                                               | Incident reporting | 143 'reintubation' events taken from data set | None          | Primary aim              | No                    | Staff                       | Yes                                                             | Based on previous framework: AIMS-ICU (Beckmann et al 1996)                                                         | N/A                                                   |
| Beckmann et al (1996a, 1996b) <sup>3;4</sup> | Australia | Intensive care: 7 intensive care units                                                                      | Incident Reporting | 610 incidents from 536 reports                | None          | Secondary aim            | No                    | Staff                       | Yes                                                             | Based on previous framework: AIMS-ICU (Beckmann et al 1996)                                                         | N/A                                                   |

|                                                                       |                   |                                                           |                    |                                                        |                                                                        |               |    |       |     |                                                                                                             |     |
|-----------------------------------------------------------------------|-------------------|-----------------------------------------------------------|--------------------|--------------------------------------------------------|------------------------------------------------------------------------|---------------|----|-------|-----|-------------------------------------------------------------------------------------------------------------|-----|
| Buckley et al (1997) <sup>5</sup>                                     | China (Hong Kong) | Intensive care: 14 bed ICU serving 1430 bed hospital      | Incident reporting | 281 critical incidents over a 3 year period            | Specific: Reason (1990), Eagle, Davies & Reason (1992), Allnutt (1987) | Primary aim   | No | Staff | Yes | Based on AIMS framework (Webb et al 1993)                                                                   | N/A |
| Busse & Wright (2000) <sup>6</sup> ; Wright et al (1991) <sup>7</sup> | UK                | Intensive care                                            | Incident reporting | 710 incident reports                                   | Broad: Rasumussen et al 1987– performance shaping factors              | Secondary aim | No | Staff | Yes | Uses the Edinburgh Incident Analysis Framework (no further reference)                                       | N/A |
| Callum et al (2001) <sup>8</sup>                                      | Canada            | General Hospital: University affiliated teaching hospital | Incident reporting | 819 transfusion incidents reported (Feb 1999-Aug 2000) | None                                                                   | Secondary aim | No | Staff | No  | A. Qualitative: free text coding<br>B. Based on previous framework (Eindhoven Medical Model Classification) | N/A |

|                                 |           |                                                                                                                        |                               |                                                                                                      |      |               |    |       |     |                                                                                                                                             |                                                                                                                             |
|---------------------------------|-----------|------------------------------------------------------------------------------------------------------------------------|-------------------------------|------------------------------------------------------------------------------------------------------|------|---------------|----|-------|-----|---------------------------------------------------------------------------------------------------------------------------------------------|-----------------------------------------------------------------------------------------------------------------------------|
| Chang et al (2008) <sup>9</sup> | USA       | General reporting system (nationwide US Vaccine and Drug Safety Reporting System)                                      | Incident reporting            | 115 events identified involving the 'mix-up of tuberculin purified protein derivatives and vaccines' | None | Primary aim   | No | Staff | No  | Unclear whether a previous framework was used, or whether the factors were identified from qualitative free text coding of incident reports | N/A                                                                                                                         |
| Cote et al (2000) <sup>10</sup> | USA       | Anaesthesia: Hospital based paediatric sedation incidents were subset of dataset (non-hospital settings also included) | Incident reporting and Survey | Total of 118 reports of adverse sedation events.                                                     | None | Primary aim   | No | Staff | No  | Qualitative: free text coding of incident reports                                                                                           | 95 incidents from total pool retained (where all coders could agree on contributory factors), 43 of these based in hospital |
| Currie (1989) <sup>11</sup>     | Australia | Anaesthesia Two teaching hospitals - wards which used anaesthesia                                                      | Incident reporting            | 167 Anaesthesia reports Jan 1986-June 1988                                                           | None | Secondary aim | No | Staff | Yes | Based on previous framework: ACES report (see Currie et al, 1988)                                                                           | N/A                                                                                                                         |

|                                        |           |                                                                           |                    |                          |      |               |    |       |     |                                                                                                                                                                                                                              |                                               |
|----------------------------------------|-----------|---------------------------------------------------------------------------|--------------------|--------------------------|------|---------------|----|-------|-----|------------------------------------------------------------------------------------------------------------------------------------------------------------------------------------------------------------------------------|-----------------------------------------------|
| Currie et al (1988) <sup>12</sup>      | Australia | Anaesthesia<br>Two teaching hospitals - wards which used anaesthesia      | Incident reporting | 88 anaesthesia incidents | None | Secondary aim | No | Staff | Yes | Not specified                                                                                                                                                                                                                | N/A                                           |
| Elnicki & Schmitt (1980) <sup>13</sup> | USA       | General hospital:<br>10 nursing service units in a large Florida Hospital | Incident reporting | 432 reported incidents   | None | Primary aim   | No | Staff | Yes | A. Interviews<br>B. Unsystematic literature review<br>C. Author consensus<br>Were all used to identify <i>measurable</i> factors which could be related to the occurrence of reported incidents on each of the nursing units | Interviews were with 'key hospital personnel' |

|                                        |             |                                                                                                                                       |                    |                                                                 |                                     |               |    |       |     |                                                                                                      |     |
|----------------------------------------|-------------|---------------------------------------------------------------------------------------------------------------------------------------|--------------------|-----------------------------------------------------------------|-------------------------------------|---------------|----|-------|-----|------------------------------------------------------------------------------------------------------|-----|
| Frey et al (2000) <sup>14</sup>        | Switzerland | Intensive care<br>Multi-disciplinary, neonatal paediatric intensive care unit (ICU) of a non-university, teaching children's hospital | Incident reporting | 211 critical incidents over 1 year period (467 child admission) | None                                | Secondary aim | No | Staff | Yes | Based on previous framework: AIMS-ICU (Beckmann et al 1996)                                          | N/A |
| Galletly & Mushet (1991) <sup>15</sup> | New Zealand | Anaesthesia                                                                                                                           | Incident reporting | 100 reports over three month period                             | Broad: 'systems' approach mentioned | Primary aim   | No | Staff | No  | Unclear but likely to be from free text coding of incident reports                                   | N/A |
| Graf et al (2005) <sup>16</sup>        | Germany     | Intensive care<br>Medical Intensive Care Unit in University Hospital                                                                  | Incident reporting | 45 incident report forms                                        | None                                | Primary aim   | No | Staff | Yes | Based on previous framework: Australian Patient Safety Foundation Incident form (no reference given) | N/A |



|                                        |        |                                                                             |                    |                                                        |                                                        |               |    |                        |     |                                                                                       |     |
|----------------------------------------|--------|-----------------------------------------------------------------------------|--------------------|--------------------------------------------------------|--------------------------------------------------------|---------------|----|------------------------|-----|---------------------------------------------------------------------------------------|-----|
| Harding & Petrick (2008) <sup>17</sup> | Canada | Not reported<br>Student nurses (no details of hospitals in which they work) | Incident reporting | 77 incident reports                                    | None                                                   | Primary aim   | No | Staff (student nurses) | No  | Qualitative: free text coding of incident reports                                     | N/A |
| Inoue & Koizumi (2004) <sup>18</sup>   | Japan  | General Hospital:<br>Tertiary care general hospitals                        | Incident reporting | 300 incident reports randomly sampled from 6 hospitals | None                                                   | Secondary aim | No | Staff                  | Yes | Based on previous framework: EDIT model (see Inoue et al 2002 for an earlier version) | N/A |
| Kaplan et al (1998) <sup>19</sup>      | USA    | Transfusion:<br>2 blood centres and 2 hospital transfusion service          | Incident reporting | 503 event reports                                      | Specific: Reason (1990) and Rasmussen (1987) mentioned | Secondary aim | No | Staff                  | Yes | Based on previous framework: Eindhoven Classification (Van Vuuren, 1998)              | N/A |

|                                                                                                                                                                    |          |                                                                  |                    |                                         |                                                                                       |               |    |       |     |                                                                                                                     |     |
|--------------------------------------------------------------------------------------------------------------------------------------------------------------------|----------|------------------------------------------------------------------|--------------------|-----------------------------------------|---------------------------------------------------------------------------------------|---------------|----|-------|-----|---------------------------------------------------------------------------------------------------------------------|-----|
| Khan & Hoda (2001) <sup>20</sup>                                                                                                                                   | Pakistan | Surgery: Operating room suite in a teaching hospital in Pakistan | Incident reporting | 329 reports from Aug 1997-December 1999 | Broad: very broad-human/system/design-equipment , attributed to Runciman et al (1993) | Secondary aim | No | Staff | Yes | Based on previous framework: AIMS (Runciman et al, 1993)                                                            | N/A |
| Kusumaphanyo et al (2009) <sup>21</sup> ; Klanarong et al (2005) <sup>22</sup> ; Sintavanuruk et al (2008) <sup>23</sup> Charuluxananan et al (2008) <sup>24</sup> | Thailand | General Hospital: 51 Hospitals across Thailand                   | Incident reporting | 1996 incidents                          | None                                                                                  | Primary aim   | No | Staff | Yes | Based on previous framework: Thai AIMS study (unable to identify reference describing development of the framework) | N/A |

|                                  |                     |                                                                                                |                    |                                                                     |      |               |    |       |     |                                                                                                                              |     |
|----------------------------------|---------------------|------------------------------------------------------------------------------------------------|--------------------|---------------------------------------------------------------------|------|---------------|----|-------|-----|------------------------------------------------------------------------------------------------------------------------------|-----|
| Lundy et al (2007) <sup>25</sup> | Republic of Ireland | Transfusion Hospitals with established haemovigilance officer in post                          | Incident reporting | 759 near miss incidents                                             | None | Primary aim   | No | Staff | Yes | Based on previous framework: MERS-TM (Battles et al 1998) which used Eindhoven Classification                                | N/A |
| Morita (2004) <sup>26</sup>      | Japan               | General hospital Outpatients from university hospital                                          | Incident reporting | 73 potential adverse drug event related to dispensing of wrong drug | None | Secondary aim | No | Staff | Yes | Based on previous framework: Japanese Ministry of Health, Labor and Welfare (2001)                                           | N/A |
| Nast et al (2005) <sup>27</sup>  | USA                 | Intensive Care: Cardiothoracic intensive care unit & Cardiothoracic post anaesthesia care unit | Incident reporting | 163 reports describing 157 events.                                  | None | Primary aim   | No | Staff | No  | Qualitative: free text coding of incident reports<br><br>Based on previous framework: Eindhoven Medical Model Classification | N/A |

|                                                                                                                                                        |                   |                                                                                                                                             |                    |                                                            |                                                                        |               |    |       |     |                                                                    |     |
|--------------------------------------------------------------------------------------------------------------------------------------------------------|-------------------|---------------------------------------------------------------------------------------------------------------------------------------------|--------------------|------------------------------------------------------------|------------------------------------------------------------------------|---------------|----|-------|-----|--------------------------------------------------------------------|-----|
| Needham et al (2004) <sup>28</sup> ; Needham et al (2005) <sup>29</sup> ; Holzmueller et al (2005) <sup>30</sup> ; Sinopoli et al (2007) <sup>31</sup> | USA               | Intensive Care: Intensive care units                                                                                                        | Incident reporting | In total 1353 incident reports                             | Broad: Systems approach Reason (2000)                                  | Primary aim   | No | Staff | Yes | Based on previous framework: London protocol (Vincent et al, 1998) | N/A |
| Nuckols et al (2008, 2009) <sup>32,33</sup>                                                                                                            | USA               | General hospital: Academic referral centre: and a nearby affiliated community hospital in a major metropolitan area in Southern California. | Incident reporting | 2228 incident reports for 16575 randomly selected patients | Specific: Reason, 1990                                                 | Primary aim   | No | Staff | Yes | Literature review (not systematic)                                 | N/A |
| Short et al (1996) <sup>34</sup>                                                                                                                       | China (Hong Kong) | General Hospital: Two large public hospitals in Hong Kong                                                                                   | Incident reporting | 1037 incidents                                             | Broad: references to latent error in discussion cited to Reason (1990) | Secondary aim | No | Staff | Yes | Based on previous framework: AIMS-ICU (Beckmann et al 1996)        | N/A |

|                                   |     |                                                                                      |                    |                                                                    |                                                                                                                                        |               |     |       |     |                                                                                                                                                      |                                                                                                                                      |
|-----------------------------------|-----|--------------------------------------------------------------------------------------|--------------------|--------------------------------------------------------------------|----------------------------------------------------------------------------------------------------------------------------------------|---------------|-----|-------|-----|------------------------------------------------------------------------------------------------------------------------------------------------------|--------------------------------------------------------------------------------------------------------------------------------------|
| Skapik et al (2009) <sup>35</sup> | USA | Intensive care: 23 Intensive care units nationwide which treated paediatric patients | Incident reporting | 464 paediatric incidents reported from July 1 2002 to June 30 2004 | None                                                                                                                                   | Primary aim   | Yes | Staff | No  | Qualitative: free text coding<br><br>This analysis was structured based on a previous framework – the ICUSRS (Wu et al 2002; Holzmueller et al 2005) | N/A                                                                                                                                  |
| Suresh et al (2004) <sup>36</sup> | USA | Intensive care: Neonatal intensive care units                                        | Incident reporting | Total pool of 1230 reports                                         | Broad: systems approaches to understanding error mentioned in discussion (Reason, 1997, 2000; Vincent 2003, Vincent et al, 1998) cited | Secondary aim | No  | Staff | Yes | Way in which possible contributory factors were elicited was not specified                                                                           | 708 incident reports (which used a structured rather than free text format) were used in relation to prevalence contributory factors |

|                                       |           |                                             |                    |                                     |               |               |    |                        |     |                                                                                                                      |     |
|---------------------------------------|-----------|---------------------------------------------|--------------------|-------------------------------------|---------------|---------------|----|------------------------|-----|----------------------------------------------------------------------------------------------------------------------|-----|
| Tuttle et al (2004) <sup>37</sup>     | USA       | General hospital: 750 bed teaching hospital | Incident reporting | 2843 safety events                  | None          | Secondary aim | No | Staff                  | Yes | Based on previous framework: Risk Prevention and Management (RPM) System (Doctor Quality, 2003)                      | N/A |
| Williamson et al (1993) <sup>38</sup> | Australia | Anaesthesia                                 | Incident reporting | 2000 incident reports               | Broad: Reason | Primary aim   | No | Staff                  | Yes | The way in which contributory factors were identified for inclusion in the incident reporting form was not specified | N/A |
| Wolf et al (2006) <sup>39</sup>       | USA       | National medication error database          | Incident reporting | 1305 student made medication errors | None          | Primary aim   | No | Staff (student nurses) | Yes | Based on previous framework: MEDMARX database (USP dispensing information, 2003)                                     |     |

**Appendix Table 2 Summary of data extracted from included studies: all other studies**

| Study                                    | Country | Setting                                                                      | Study method                                              | Study sample                                                       | Use of theory                                              | Identification main aim? | Human factors expert involved? | Patients or Staff reporting | Contributory factor list fully developed before data collected? | Method for eliciting contributory factors (if different from study method) | Further details about contributory factor elicitation |
|------------------------------------------|---------|------------------------------------------------------------------------------|-----------------------------------------------------------|--------------------------------------------------------------------|------------------------------------------------------------|--------------------------|--------------------------------|-----------------------------|-----------------------------------------------------------------|----------------------------------------------------------------------------|-------------------------------------------------------|
| Ahmad et al (2010) <sup>40</sup>         | Ireland | Anaesthesia Patient receiving patient controlled analgesia at Irish Hospital | Observational                                             | 27 critical incidents                                              | None                                                       | Primary aim              | No                             | Staff                       | Unclear                                                         | The way in which contributory factors were not specified.                  | N/A                                                   |
| Alfredsdottir et al (2008) <sup>41</sup> | Iceland | Surgery: Operating room department, University Hospital                      | Interview ( <i>combined interviews and focus groups</i> ) | N=8 semi structured interviews<br>N=2 focus groups (4 nurses each) | Explicit: (Reason organisational accident causation model) | Secondary aim            | No                             | Staff                       | No                                                              | Same                                                                       | N/A                                                   |
| Anoosheh et al (2008) <sup>42</sup>      | Iran    | General hospital: 3 University Hospitals in Iran                             | Survey                                                    | 96 nurses and nursing managers                                     | Specific: systems approach (Reason 2000)                   | Primary aim              | No                             | Staff                       | Yes                                                             | A. Unsystematic literature review;<br>B. Author opinion                    | N/A                                                   |
| Barach et al (2008) <sup>43</sup>        | USA     | Surgery: University Children's hospital                                      | Observational                                             | 431 paediatric cardiac operations                                  | Broad: (Reason, Carthey & de Leval,                        | Secondary aim            | No                             | Staff                       | No                                                              | Same as study method                                                       | N/A                                                   |

| Study                               | Country   | Setting                                                 | Study method                                                                                                                                                            | Study sample                                                                                                    | Use of theory                                                       | Identification main aim? | Human factors expert involved? | Patients or Staff reporting | Contributory factor list fully developed before data collected? | Method for eliciting contributory factors (if different from study method)                                    | Further details about contributory factor elicitation            |
|-------------------------------------|-----------|---------------------------------------------------------|-------------------------------------------------------------------------------------------------------------------------------------------------------------------------|-----------------------------------------------------------------------------------------------------------------|---------------------------------------------------------------------|--------------------------|--------------------------------|-----------------------------|-----------------------------------------------------------------|---------------------------------------------------------------------------------------------------------------|------------------------------------------------------------------|
|                                     |           |                                                         |                                                                                                                                                                         |                                                                                                                 | 2001)                                                               |                          |                                |                             |                                                                 |                                                                                                               |                                                                  |
| Beckmann et al (2003) <sup>44</sup> | Australia | Intensive care: 12 bed intensive care unit              | Multiple methods (A. incident reporting and B. case note reviews)                                                                                                       | A. 100 facilitated incident monitoring reports, from which 221 incidents were identified. B. 164 patient charts | None                                                                | Secondary aim            | No                             | Staff                       | Yes                                                             | Based on previous framework: AIMS-ICU (Beckmann et al 1996)                                                   | N/A                                                              |
| Beso et al (2005) <sup>45</sup>     | UK        | Pharmacy department of 450 bed London teaching hospital | Multiple methods<br>Phase 1: Observation (pharmacists asked to record details of all dispensing errors identified at final check phase for a 2 week period)<br>Phase 2: | 130 dispensing errors identified<br>27 interviews conducted with 16 members of dispensary staff                 | Explicit: based on Reason's accident causation model (Reason, 1990) | Primary aim              | No                             | Staff (pharmacy staff)      | No                                                              | Qualitative: interviews; Literature review (not systematic)<br>Based on previous framework: Dean et al (2002) | Only data from 27 interviews used to elicit contributory factors |



| Study                                               | Country | Setting                                                                                                        | Study method  | Study sample                                                                        | Use of theory                                                                             | Identification main aim? | Human factors expert involved? | Patients or Staff reporting | Contributory factor list fully developed before data collected? | Method for eliciting contributory factors (if different from study method)               | Further details about contributory factor elicitation |
|-----------------------------------------------------|---------|----------------------------------------------------------------------------------------------------------------|---------------|-------------------------------------------------------------------------------------|-------------------------------------------------------------------------------------------|--------------------------|--------------------------------|-----------------------------|-----------------------------------------------------------------|------------------------------------------------------------------------------------------|-------------------------------------------------------|
|                                                     |         |                                                                                                                | Interview     |                                                                                     |                                                                                           |                          |                                |                             |                                                                 |                                                                                          |                                                       |
| Blike et al (2005) <sup>46</sup>                    | USA     | General hospital: Dartmouth-Hitchcock Medical Center: 'Tertiary care hospital'                                 | Observational | 2 simulations in two different departments (interventional radiology and emergency) | None                                                                                      | Secondary aim            | No                             | N/A                         | No                                                              | In addition to observation used previous framework (London protocol, Vincent et al 2000) | N/A                                                   |
| Catchpole et al (2005, 2006, 2007) <sup>47-49</sup> | UK      | Surgery: Paediatric Cardiac Surgery, Children's hospital and elective orthopaedic operations, General Hospital | Observational | 24 paediatric operations, 18 orthopaedic operations                                 | Explicit: Systems approach mentioned , specifically , Reason (1990) and Helmreich (2000). | Primary aim              | Yes                            | N/A                         | No                                                              | Same                                                                                     | N/A                                                   |
| Chianca (2006) <sup>50</sup>                        | Brazil  | Anaesthesia Post anaesthesia recovery                                                                          | Interview     | 25 'fault' reports elicited via semi-                                               | Specific: Reason (1992, human                                                             | Primary aim              | No                             | Nurses                      | Yes                                                             | Qualitative: interviews                                                                  | Only data from semi-structured interviews             |

| Study                                | Country | Setting                                                               | Study method  | Study sample                                                                                                                                     | Use of theory | Identification main aim? | Human factors expert involved? | Patients or Staff reporting | Contributory factor list fully developed before data collected? | Method for eliciting contributory factors (if different from study method) | Further details about contributory factor elicitation |
|--------------------------------------|---------|-----------------------------------------------------------------------|---------------|--------------------------------------------------------------------------------------------------------------------------------------------------|---------------|--------------------------|--------------------------------|-----------------------------|-----------------------------------------------------------------|----------------------------------------------------------------------------|-------------------------------------------------------|
|                                      |         | rooms (PAR) of ten medium and large sized hospitals in Belo Horizonte |               | structured interviews. 15 'experts' then judged each report according to a set of contributory factors elicited from the interviews              | error)        |                          |                                |                             |                                                                 |                                                                            | used in elicitation of contributory factors           |
| Christian et al (2006) <sup>51</sup> | USA     | Surgery Operating room                                                | Observational | 9 surgery cases (colorectal cases involving pelvic dissections and hepatobiliary cases), mean case duration 4 hours 27 minutes (range 2:02-9:33) | None          | Primary aim              | Yes                            | N/A                         | No                                                              | N/A                                                                        | N/A                                                   |

| Study                              | Country   | Setting                                                      | Study method | Study sample                                                                                                                                                                                | Use of theory                                 | Identification main aim? | Human factors expert involved? | Patients or Staff reporting | Contributory factor list fully developed before data collected? | Method for eliciting contributory factors (if different from study method)                        | Further details about contributory factor elicitation |
|------------------------------------|-----------|--------------------------------------------------------------|--------------|---------------------------------------------------------------------------------------------------------------------------------------------------------------------------------------------|-----------------------------------------------|--------------------------|--------------------------------|-----------------------------|-----------------------------------------------------------------|---------------------------------------------------------------------------------------------------|-------------------------------------------------------|
| Coombes et al (2008) <sup>52</sup> | Australia | General Hospital: 700 bed teaching hospital                  | Interview    | 14 interviews with interns, reporting 21 prescribing errors                                                                                                                                 | Broad: Reason's chain of errors (Reason 1990) | Primary aim              | No                             | Staff (interns)             | No                                                              | A. Qualitative: interviews; B. Based on previous framework: London protocol (Vincent et al, 2000) | N/A                                                   |
| Cooper et al (1984) <sup>53</sup>  | USA       | General Hospital: Four hospitals in Boston Metropolitan area | Interview    | 1089 incidents (616 from phase 1 interviews, 234 from introductory interviews with trained observers; 239 subsequently reported via telephone by trained observers); from 139 anaesthesiolo | None                                          | Secondary aim            | No                             | Staff                       | No                                                              | N/A                                                                                               | N/A                                                   |

| Study                             | Country | Setting                                                                              | Study method                                                                                 | Study sample                                                                             | Use of theory           | Identification main aim? | Human factors expert involved? | Patients or Staff reporting | Contributory factor list fully developed before data collected? | Method for eliciting contributory factors (if different from study method)                                                | Further details about contributory factor elicitation |
|-----------------------------------|---------|--------------------------------------------------------------------------------------|----------------------------------------------------------------------------------------------|------------------------------------------------------------------------------------------|-------------------------|--------------------------|--------------------------------|-----------------------------|-----------------------------------------------------------------|---------------------------------------------------------------------------------------------------------------------------|-------------------------------------------------------|
|                                   |         |                                                                                      |                                                                                              | gists, residents and nurse anaesthetists                                                 |                         |                          |                                |                             |                                                                 |                                                                                                                           |                                                       |
| Cronin(2006) <sup>54</sup>        | Canada  | General hospital: Winnipeg Regional Health Authority                                 | Multiple methods: Incident reporting; and case studies of specific incidents.                | Pilot: 8 incidents, which comprised 38 interviews<br>Roll-out: 30 incidents reviewed     | Specific: Reason 1990   | Secondary aim            | No                             | Staff                       | No                                                              | A. Interviews from identified incidents<br>B. Based on previous framework (London Protocol, Taylor-Adams & Vincent, 2004) | N/A                                                   |
| Cullen et al (1997) <sup>55</sup> | USA     | Surgery and Medicine<br>11 medical and surgical units in two tertiary care hospitals | Multiple methods<br>Incidents elicited via a variety of methods including<br>A. Interviews – | 4,031 patients studied prospectively<br>266 preventable or potential adverse drug events | Specific: Reason (1990) | Primary aim              | No                             | Staff                       | Yes                                                             | The way in which the contributory factors were identified was not specified.                                              | N/A                                                   |

| Study                                     | Country     | Setting                                                  | Study method                                                                                                                                                                                                                                    | Study sample                                              | Use of theory | Identification main aim? | Human factors expert involved? | Patients or Staff reporting | Contributory factor list fully developed before data collected? | Method for eliciting contributory factors (if different from study method) | Further details about contributory factor elicitation |
|-------------------------------------------|-------------|----------------------------------------------------------|-------------------------------------------------------------------------------------------------------------------------------------------------------------------------------------------------------------------------------------------------|-----------------------------------------------------------|---------------|--------------------------|--------------------------------|-----------------------------|-----------------------------------------------------------------|----------------------------------------------------------------------------|-------------------------------------------------------|
|                                           |             |                                                          | unit personnel asked to report incidents to investigators, investigators also asked staff for further errors<br>B. investigators reviewed charts daily<br>C. Structured interviews with those involved in identified preventable adverse events | identified; 236 structured interviews conducted           |               |                          |                                |                             |                                                                 |                                                                            |                                                       |
| Davis et al (2001, 2003) <sup>56;57</sup> | New Zealand | General Hospital Acute care hospitals with over 100 beds | Case note review                                                                                                                                                                                                                                | Medical records of 6579 patients; of which adverse events | None          | Secondary aim            | No                             | Staff                       | Unclear                                                         | Not specified                                                              | N/A                                                   |

| Study                               | Country | Setting                                                                         | Study method                             | Study sample                                                                                                                                                                                                                                            | Use of theory               | Identification main aim? | Human factors expert involved? | Patients or Staff reporting | Contributory factor list fully developed before data collected? | Method for eliciting contributory factors (if different from study method)                                                                                        | Further details about contributory factor elicitation |
|-------------------------------------|---------|---------------------------------------------------------------------------------|------------------------------------------|---------------------------------------------------------------------------------------------------------------------------------------------------------------------------------------------------------------------------------------------------------|-----------------------------|--------------------------|--------------------------------|-----------------------------|-----------------------------------------------------------------|-------------------------------------------------------------------------------------------------------------------------------------------------------------------|-------------------------------------------------------|
|                                     |         |                                                                                 |                                          | reported in 339 notes.                                                                                                                                                                                                                                  |                             |                          |                                |                             |                                                                 |                                                                                                                                                                   |                                                       |
| De Leval et al (2000) <sup>58</sup> | UK      | Surgery: Neonatal arterial switch operations (21 surgeons from 16 institutions) | Multiple methods<br>Observational Survey | Total of 243 operations<br>Observation: 193 observed, of these 173 thought to be 'sufficiently reliable'<br>Survey: completed at the completion of the operation by the surgeon, first and second assistant, anaesthetist, perfusionist and scrub nurse | None                        | Primary aim              | Yes                            | Staff                       | No                                                              | In addition to observations, survey was based on previous framework: STAR – Surgical Team Assessment Reward (STAR) questionnaire (no reference for this provided) | N/A                                                   |
| Dean et al (2002) <sup>59</sup>     | UK      | Pharmacy: Based in pharmacy of                                                  | Multiple methods<br>Interview            | Only interview data reported in paper: 44                                                                                                                                                                                                               | Explicit: Reason's model of | Primary aim              | No                             | Staff (doctors)             | No                                                              | Qualitative interviews<br>Also based                                                                                                                              | N/A                                                   |

| Study                                                         | Country | Setting                                                                              | Study method                       | Study sample                                                                                                                      | Use of theory                                  | Identification main aim? | Human factors expert involved? | Patients or Staff reporting | Contributory factor list fully developed before data collected? | Method for eliciting contributory factors (if different from study method)                            | Further details about contributory factor elicitation |
|---------------------------------------------------------------|---------|--------------------------------------------------------------------------------------|------------------------------------|-----------------------------------------------------------------------------------------------------------------------------------|------------------------------------------------|--------------------------|--------------------------------|-----------------------------|-----------------------------------------------------------------|-------------------------------------------------------------------------------------------------------|-------------------------------------------------------|
|                                                               |         | Inpatient hospital                                                                   | Survey<br>Case note review         | interviews regarding prescribing errors (41 doctors)                                                                              | human error (Reason, 1990)                     |                          |                                |                             |                                                                 | on previous framework: London protocol, Vincent et al, 2000)                                          |                                                       |
| Dornan et al (2009) <sup>60</sup> , Chapter 4 of final report | UK      | General hospital<br>Foundation Year 1 doctors from Nationwide set of medical schools | Interview                          | N=30 interviews, describing 85 prescribing errors                                                                                 | Explicit: Reason organisational accident model | Primary aim              | No                             | Staff (student doctors)     | No                                                              | N/A                                                                                                   | N/A                                                   |
| Elbardissi et al (2007) <sup>61</sup>                         | USA     | Surgery: Cardiovascular surgery operating room                                       | Survey (administered face to face) | 68 staff: 16 cardiac anaesthesiologists; 13 monitor technicians; 11 registered nurses; 10 'CSTs'; 7 perfusionists; 4 residents; 4 | Explicit: Reason's model of accident causation | Primary aim              | No                             | Staff                       | Yes                                                             | Based on previous framework: Human Factors Analysis Classification System (Wiegmann & Shappell, 2003) | N/A                                                   |

| Study                                     | Country | Setting                                                                | Study method                                                                                                                         | Study sample                                                                | Use of theory        | Identification main aim? | Human factors expert involved? | Patients or Staff reporting | Contributory factor list fully developed before data collected? | Method for eliciting contributory factors (if different from study method)                                     | Further details about contributory factor elicitation                                                                                                                       |
|-------------------------------------------|---------|------------------------------------------------------------------------|--------------------------------------------------------------------------------------------------------------------------------------|-----------------------------------------------------------------------------|----------------------|--------------------------|--------------------------------|-----------------------------|-----------------------------------------------------------------|----------------------------------------------------------------------------------------------------------------|-----------------------------------------------------------------------------------------------------------------------------------------------------------------------------|
|                                           |         |                                                                        |                                                                                                                                      | senior cardiac surgeons; 3 'SAs'                                            |                      |                          |                                |                             |                                                                 |                                                                                                                |                                                                                                                                                                             |
| Fabri & Zayas-Castro (2008) <sup>62</sup> | USA     | Surgery: Surgical hospital department                                  | Multiple methods used to develop and test a classification of error underlying surgical errors<br>A. Survey<br>B. Incident reporting | Survey: 48 surveys<br>Incident reporting:<br>Data reported on 9830 patients | Broad: Reason (1990) | Secondary aim            | No                             | Staff                       | Yes                                                             | To develop the contributory factor list<br>A. Interviews with experts<br>B. Literature review (not systematic) | A. Faculty members from at least 6 surgical disciplines (general surgery, surgical oncology, paediatric surgery, plastic surgery, vascular surgery, cardiothoracic surgery) |
| Forster et al (2006) <sup>63</sup>        | Canada  | Maternity: Labour and delivery unit at tertiary care centre in Eastern | Observational                                                                                                                        | 425 patient encounters identified by trained observer                       | None                 | Secondary aim            | No                             | Staff                       | Yes                                                             | A. Literature review (not systematic)<br>B. External expert group                                              | N/A                                                                                                                                                                         |



| Study                              | Country | Setting                                                   | Study method                                                                                                                                       | Study sample                                | Use of theory           | Identification main aim? | Human factors expert involved? | Patients or Staff reporting | Contributory factor list fully developed before data collected? | Method for eliciting contributory factors (if different from study method)                  | Further details about contributory factor elicitation |
|------------------------------------|---------|-----------------------------------------------------------|----------------------------------------------------------------------------------------------------------------------------------------------------|---------------------------------------------|-------------------------|--------------------------|--------------------------------|-----------------------------|-----------------------------------------------------------------|---------------------------------------------------------------------------------------------|-------------------------------------------------------|
|                                    |         | Ontario, Canada                                           |                                                                                                                                                    |                                             |                         |                          |                                |                             |                                                                 |                                                                                             |                                                       |
| Galvan et al (2005) <sup>64</sup>  | USA     | Surgery<br>Paediatric<br>Cardiac<br>Surgery               | Observational (although paper describes case note review and survey in method, only results from observational element to study are reported here) | 22 cardiac surgery cases                    | Specific: Reason (1990) | Primary aim              | No                             | N/A                         | No                                                              | Same                                                                                        | N/A                                                   |
| Gawande et al (2003) <sup>65</sup> | USA     | Surgery<br>Surgeons at three different teaching hospitals | Interview                                                                                                                                          | 38 surgeons interviewed                     | None                    | Secondary aim            | No                             | Staff (doctors)             | Yes                                                             | Qualitative: interviews; Based on previous framework: London protocol (Vincent et al, 1998) | N/A                                                   |
| Giraud et al (1993) <sup>66</sup>  | France  | Intensive care<br>Intensive                               | Observational                                                                                                                                      | 316 iatrogenic complications identified and | None                    | Primary aim              | No                             | Staff (doctors)             | Yes                                                             | Based on previous framework                                                                 | N/A                                                   |

| Study                             | Country | Setting                                                            | Study method                                                                         | Study sample                                                                                                                                                  | Use of theory           | Identification main aim? | Human factors expert involved? | Patients or Staff reporting | Contributory factor list fully developed before data collected? | Method for eliciting contributory factors (if different from study method)                                                                                                                                     | Further details about contributory factor elicitation |
|-----------------------------------|---------|--------------------------------------------------------------------|--------------------------------------------------------------------------------------|---------------------------------------------------------------------------------------------------------------------------------------------------------------|-------------------------|--------------------------|--------------------------------|-----------------------------|-----------------------------------------------------------------|----------------------------------------------------------------------------------------------------------------------------------------------------------------------------------------------------------------|-------------------------------------------------------|
|                                   |         | care units                                                         |                                                                                      | coded                                                                                                                                                         |                         |                          |                                |                             |                                                                 | (Cooper et al, 1978)                                                                                                                                                                                           |                                                       |
| Graber et al (2005) <sup>67</sup> | USA     | General hospital<br>5 large academic tertiary care medical centres | Multiple methods:<br>Case note review<br>Incident reporting<br>Interviews with staff | 100 cases of diagnostic error identified from 3 sources<br>A. Quality assurance activities (57)<br>B. Voluntary reports (33)<br>C. Autopsy discrepancies (10) | None                    | Primary aim              | No                             | Staff                       | No                                                              | Qualitative interviews<br>Free text coding of reported incidents<br><br>Also based on previous framework: root cause checklist developed by VHA (cited references – Johnson, NO YEAR; Henrisen & Kaplan, 2003) | N/A                                                   |
| Hamman et al (2009) <sup>68</sup> | USA     | Maternity: Labour and delivery                                     | Observational                                                                        | 4 'in-situ' simulations run and                                                                                                                               | Broad: latent environme | Primary aim              | No                             | Staff                       | No                                                              | Same                                                                                                                                                                                                           | N/A                                                   |

| Study                                | Country | Setting                                                                                                                      | Study method | Study sample                                                                                                                 | Use of theory                                 | Identification main aim? | Human factors expert involved? | Patients or Staff reporting | Contributory factor list fully developed before data collected? | Method for eliciting contributory factors (if different from study method)                              | Further details about contributory factor elicitation |
|--------------------------------------|---------|------------------------------------------------------------------------------------------------------------------------------|--------------|------------------------------------------------------------------------------------------------------------------------------|-----------------------------------------------|--------------------------|--------------------------------|-----------------------------|-----------------------------------------------------------------|---------------------------------------------------------------------------------------------------------|-------------------------------------------------------|
|                                      |         | ward of midsized Midwestern community hospital.                                                                              |              | responses of healthcare team observed. Follow up interviews conducted with 9 staff                                           | nt threats to safety mentioned (Reason, 1997) |                          |                                |                             |                                                                 |                                                                                                         |                                                       |
| Horwitz et al (2009) <sup>69</sup>   | USA     | General hospital 944 bed urban academic medical centre with both emergency medicine and internal medicine residency programs | Survey       | 40 survey responses from medical staff which described adverse event or near miss after emergency department floor transfers | None                                          | Primary aim              | No                             | Staff                       | No                                                              | Qualitative: free text coding of survey responses<br><br>Followed by literature review (not systematic) | N/A                                                   |
| Itoh & Andersen (2007) <sup>70</sup> | Japan   | General hospital: University hospital in                                                                                     | Survey       | Surveys received from: Patients N=920                                                                                        | None                                          | Primary aim              | No                             | Staff and patients          | Yes                                                             | Based on previous framework: Taken from a                                                               | N/A                                                   |

| Study                            | Country | Setting                                                                                         | Study method                                  | Study sample                                                                           | Use of theory                                                  | Identification main aim? | Human factors expert involved? | Patients or Staff reporting | Contributory factor list fully developed before data collected? | Method for eliciting contributory factors (if different from study method)                            | Further details about contributory factor elicitation |
|----------------------------------|---------|-------------------------------------------------------------------------------------------------|-----------------------------------------------|----------------------------------------------------------------------------------------|----------------------------------------------------------------|--------------------------|--------------------------------|-----------------------------|-----------------------------------------------------------------|-------------------------------------------------------------------------------------------------------|-------------------------------------------------------|
|                                  |         | Tokyo                                                                                           |                                               | Doctors N=164<br>Nurses N=795                                                          |                                                                |                          |                                |                             |                                                                 | patient questionnaire originally developed for a Danish survey - no reference given                   |                                                       |
| Kopp et al (2006) <sup>71</sup>  | USA     | Intensive care Medical/ surgical ICU (16 bed) at a tertiary care academic medical centre        | Observation                                   | Thirty-three 12 hour shifts were observed, from these 132 medication errors identified | None                                                           | Primary aim              | No                             | Staff                       | Yes                                                             | Based on previous framework: ADE Prevention Study Group (Bates et al, 1995; Leape et al, 1995)        | N/A                                                   |
| Leape et al (1995) <sup>72</sup> | USA     | General hospital: non obstetric adult patients at two tertiary hospitals, admitted to any of 11 | Multiple methods: Case note review Interviews | 264 preventable events identified, including 334 errors                                | Specific: Reason (1990) and others related to systems failures | Primary aim              | No                             | Staff                       | No                                                              | Qualitative interviews External expert group analysed the interviews to determine contributory factor | N/A                                                   |

| Study                              | Country | Setting                                                                                        | Study method                                            | Study sample                                                                                                               | Use of theory | Identification main aim? | Human factors expert involved? | Patients or Staff reporting        | Contributory factor list fully developed before data collected? | Method for eliciting contributory factors (if different from study method)   | Further details about contributory factor elicitation |
|------------------------------------|---------|------------------------------------------------------------------------------------------------|---------------------------------------------------------|----------------------------------------------------------------------------------------------------------------------------|---------------|--------------------------|--------------------------------|------------------------------------|-----------------------------------------------------------------|------------------------------------------------------------------------------|-------------------------------------------------------|
|                                    |         | units over a 6 month period                                                                    |                                                         |                                                                                                                            |               |                          |                                |                                    |                                                                 |                                                                              |                                                       |
| Lesar et al (1997) <sup>73</sup>   | USA     | General hospital: 631 bed tertiary care teaching hospital located in North-eastern New York    | Case note review (specific review of medication orders) | total of 701 errors selected from larger pool of 2103 confirmed clinically significant medication errors (every third one) | None          | Primary aim              | No                             | Staff (pharmacists and physicians) | Yes                                                             | Literature review<br>Author opinion                                          | N/A                                                   |
| Meurier et al (1997) <sup>74</sup> | UK      | General hospital: District general hospital, and nursing staff attending a day training course | Survey                                                  | 129                                                                                                                        | None          | Primary aim              | No                             | Staff (nurses)                     | Yes                                                             | Based on previous framework: Medical mistakes questionnaire (Wu et al, 1991) | N/A                                                   |
| Neale et al (2001) <sup>75</sup>   | UK      | General hospital: General                                                                      | Case note review                                        | 840 cases reviewed, clinical                                                                                               | None          | Primary aim              | No                             | Staff                              | No                                                              | Qualitative: free text coding of                                             | N/A                                                   |

| Study                             | Country                                             | Setting                                                                            | Study method  | Study sample                                                                                                                                                                               | Use of theory                                                     | Identification main aim? | Human factors expert involved? | Patients or Staff reporting | Contributory factor list fully developed before data collected? | Method for eliciting contributory factors (if different from study method) | Further details about contributory factor elicitation |
|-----------------------------------|-----------------------------------------------------|------------------------------------------------------------------------------------|---------------|--------------------------------------------------------------------------------------------------------------------------------------------------------------------------------------------|-------------------------------------------------------------------|--------------------------|--------------------------------|-----------------------------|-----------------------------------------------------------------|----------------------------------------------------------------------------|-------------------------------------------------------|
|                                   |                                                     | medicine, general surgery and orthopaedics from two acute hospitals in London area |               | reviewers wrote brief narratives of the key points of each hospital admission before completing detailed questionnaires. Total of 103 narratives identifying a total of 118 adverse events |                                                                   |                          |                                |                             |                                                                 | narratives                                                                 |                                                       |
| Parker et al (2010) <sup>76</sup> | Data collected in USA, first author affiliation UKJ | Surgery: Cardiovascular surgery operating room                                     | Observational | Total of 22 operations: 12 were used as calibration to develop a surgical flow disruption tool and 10 were                                                                                 | Explicit: The Tool was developed based on Reason's model of human | Primary aim              | Yes                            | N/A                         | No                                                              | Observation                                                                | N/A                                                   |

| Study                              | Country | Setting                                                               | Study method                                                                                            | Study sample                                                            | Use of theory                                                | Identification main aim? | Human factors expert involved? | Patients or Staff reporting     | Contributory factor list fully developed before data collected? | Method for eliciting contributory factors (if different from study method) | Further details about contributory factor elicitation |
|------------------------------------|---------|-----------------------------------------------------------------------|---------------------------------------------------------------------------------------------------------|-------------------------------------------------------------------------|--------------------------------------------------------------|--------------------------|--------------------------------|---------------------------------|-----------------------------------------------------------------|----------------------------------------------------------------------------|-------------------------------------------------------|
|                                    |         |                                                                       |                                                                                                         | used to validate the tool.                                              | error (1990), and work of Wiegmann and Shappell (2003)       |                          |                                |                                 |                                                                 |                                                                            |                                                       |
| Pearse et al (2001) <sup>77</sup>  | UK      | Surgery: Operating suite of a typical acute district general hospital | Observation                                                                                             | 159 surgery cases (93% of those operated on in the 30 day study period) | Broad: Reference to Reason's (2000) concept of latent errors | Primary aim              | No                             | Anaesthetists at each operation | Yes                                                             | Way in which possible contributory factors were elicited was not specified | N/A                                                   |
| Proctor et al (2003) <sup>78</sup> | Canada  | General hospital: Hospital for Sick Children in Toronto               | Multiple methods: Case note review<br>Observation (including review of patient charts and attendance at | 64 paediatric cases aged 1 month-17 years                               | None                                                         | Primary aim              | No                             | N/A                             | Yes                                                             | Way in which possible contributory factors were elicited was not specified | N/A                                                   |

| Study                                 | Country | Setting                                                                            | Study method                                                                                                     | Study sample                                 | Use of theory                                                              | Identification main aim? | Human factors expert involved? | Patients or Staff reporting | Contributory factor list fully developed before data collected? | Method for eliciting contributory factors (if different from study method) | Further details about contributory factor elicitation |
|---------------------------------------|---------|------------------------------------------------------------------------------------|------------------------------------------------------------------------------------------------------------------|----------------------------------------------|----------------------------------------------------------------------------|--------------------------|--------------------------------|-----------------------------|-----------------------------------------------------------------|----------------------------------------------------------------------------|-------------------------------------------------------|
|                                       |         |                                                                                    | clinical ward rounds with attending surgeons, nurses and house staff)                                            |                                              |                                                                            |                          |                                |                             |                                                                 |                                                                            |                                                       |
| Rothschild et al (2005) <sup>79</sup> | USA     | Intensive care and coronary care unit of a 720-bed tertiary care academic hospital | Multiple methods:<br>Observation<br>Case note review<br>Incident reporting<br>Pharmacy reports<br>ADE monitoring | 120 adverse events identified                | None                                                                       | Secondary aim            | No                             | Staff                       | Yes                                                             | Way in which possible contributory factors were elicited was not specified | N/A                                                   |
| Sanghera et al (2007) <sup>80</sup>   | UK      | Intensive care 12 bed anaesthetist-led ICU in a 1000-bed UK NHS Trust              | Interviews (identified candidates for interview via observation and use of the hospitals incident reporting      | 13 interviews regarding 12 medication errors | Explicit: Interviews were analysed using Reason's accident causation model | Primary aim              | No                             | Staff                       | No                                                              | Same                                                                       | N/A                                                   |



| Study                                     | Country                                                                     | Setting                                                                                                                   | Study method                                      | Study sample                                    | Use of theory  | Identification main aim? | Human factors expert involved? | Patients or Staff reporting | Contributory factor list fully developed before data collected? | Method for eliciting contributory factors (if different from study method) | Further details about contributory factor elicitation                                                        |
|-------------------------------------------|-----------------------------------------------------------------------------|---------------------------------------------------------------------------------------------------------------------------|---------------------------------------------------|-------------------------------------------------|----------------|--------------------------|--------------------------------|-----------------------------|-----------------------------------------------------------------|----------------------------------------------------------------------------|--------------------------------------------------------------------------------------------------------------|
|                                           |                                                                             |                                                                                                                           | scheme)                                           |                                                 | (Reason, 1990) |                          |                                |                             |                                                                 |                                                                            |                                                                                                              |
| Silen-Lipponen et al (2005) <sup>81</sup> | Data collected from Finland, USA, and UK. First author affiliation: Finland | Surgery: Operating room in hospital across Finland, USA and UK                                                            | Interview                                         | 30 nurses (10 Finnish, 10 British, 10 American) | None           | Primary aim              | No                             | Staff                       | No                                                              | Qualitative (interviews)                                                   | N/A                                                                                                          |
| Singh et al (2010) <sup>82</sup>          | USA                                                                         | general hospital Paediatricians from 3 tertiary care institutions, and 2 large practice groups (community paediatricians) | Survey                                            | 726 completed survey responses                  | None           | Primary aim              | No                             | Staff                       | Yes                                                             | Literature review (not systematic) External expert group                   | External expert group consisted of experts in patient safety and diagnostic errors, and other paediatricians |
| Skibinski et al (2007) <sup>83</sup>      | USA                                                                         | Intensive care: General medical and                                                                                       | Multiple methods used to evaluate the effect of a | All patients who were admitted to these units   | None           | Secondary aim            | No                             | Staff                       | No                                                              | Qualitative: interviews<br>Also based                                      | Interviews only used for elicitation of contributory                                                         |

| Study                            | Country         | Setting                                                                        | Study method                                                                                                                                                                   | Study sample                                                                          | Use of theory                  | Identification main aim? | Human factors expert involved? | Patients or Staff reporting | Contributory factor list fully developed before data collected? | Method for eliciting contributory factors (if different from study method)                                            | Further details about contributory factor elicitation |
|----------------------------------|-----------------|--------------------------------------------------------------------------------|--------------------------------------------------------------------------------------------------------------------------------------------------------------------------------|---------------------------------------------------------------------------------------|--------------------------------|--------------------------|--------------------------------|-----------------------------|-----------------------------------------------------------------|-----------------------------------------------------------------------------------------------------------------------|-------------------------------------------------------|
|                                  |                 | medical intensive care units: Medication focus                                 | technological interview: Interviews Incident reporting Comparing accuracy of medication administration records with orders profiled by pharmacy Audits of practice Observation | who were receiving medications included in the study                                  |                                |                          |                                |                             |                                                                 | on previous framework: Leape et al (1995). Systems analysis of adverse drug events                                    | factors. No details of how many interviews conducted. |
| Smits et al (2009) <sup>84</sup> | The Netherlands | Emergency department: Emergency departments of 10 hospitals in the Netherlands | Multiple methods: Incident reporting Interview                                                                                                                                 | 522 unintended events analysed, staff made reports then were interviewed about causes | Broad: Latent errors mentioned | Primary aim              | Yes                            | Staff                       | No                                                              | Qualitative: interviews<br><br>Based on previous framework: Eindhoven Medical Classification (van Vuuren et al, 1997) | N/A                                                   |

| Study                                | Country         | Setting                                                                                               | Study method                                                           | Study sample                                                                                        | Use of theory                                                                       | Identification main aim? | Human factors expert involved? | Patients or Staff reporting | Contributory factor list fully developed before data collected? | Method for eliciting contributory factors (if different from study method)             | Further details about contributory factor elicitation |
|--------------------------------------|-----------------|-------------------------------------------------------------------------------------------------------|------------------------------------------------------------------------|-----------------------------------------------------------------------------------------------------|-------------------------------------------------------------------------------------|--------------------------|--------------------------------|-----------------------------|-----------------------------------------------------------------|----------------------------------------------------------------------------------------|-------------------------------------------------------|
| Smits et al (2010) <sup>85</sup>     | The Netherlands | General hospital<br>21 hospitals:<br>4 University,<br>6 Tertiary teaching and<br>11 general hospitals | Case note review                                                       | 744 adverse events identified through case note review, of which 736 coded for contributory factors | Specific: theoretical framework of Reason mentioned as guiding study (Reason, 1990) | Primary aim              | No                             | N/A                         | Yes                                                             | Based on previous framework: Eindhoven Medical Model Classification (van Vuuren, 1997) | N/A                                                   |
| Sutcliffe et al (2004) <sup>86</sup> | USA             | General hospital:<br>600 bed teaching hospital                                                        | Interview                                                              | 26 residents, age range 25-39 years, mean 29.8 years                                                | Broad: latent flaws referred to, Reason (1997, 2000) referred to                    | Primary aim              | No                             | Staff (Doctors)             | No                                                              | Same                                                                                   | N/A                                                   |
| Tang et al (2007) <sup>87</sup>      | Taiwan          | General hospital<br>Hospital based (no further detail given)                                          | Multiple methods:<br>Survey (with focus group involved in development) | 72 nurses responded to survey                                                                       | None                                                                                | Primary aim              | No                             | Staff (nurses)              | No                                                              | A. qualitative focus group<br>B. Literature review (not systematic)                    | 9 registered nurses participated in the focus group   |
| Tissot et al (2003) <sup>88</sup>    | France          | Geriatric and cardiovascular-thoracic                                                                 | Observation                                                            | During 20 day period, 523 opportunities                                                             | None                                                                                | Primary aim              | No                             | N/A                         | Yes                                                             | The way in which contributory                                                          | N/A                                                   |

| Study                               | Country | Setting                                            | Study method                                      | Study sample                                                                                                                                                                             | Use of theory | Identification main aim? | Human factors expert involved? | Patients or Staff reporting | Contributory factor list fully developed before data collected? | Method for eliciting contributory factors (if different from study method)               | Further details about contributory factor elicitation |
|-------------------------------------|---------|----------------------------------------------------|---------------------------------------------------|------------------------------------------------------------------------------------------------------------------------------------------------------------------------------------------|---------------|--------------------------|--------------------------------|-----------------------------|-----------------------------------------------------------------|------------------------------------------------------------------------------------------|-------------------------------------------------------|
|                                     |         | surgery unit units of 1243 bed University Hospital |                                                   | for error concerning 56 patients and 78 medication administration errors were recorded                                                                                                   |               |                          |                                |                             |                                                                 | factors were elicited for inclusion on the structured observation form was not specified |                                                       |
| Tucker & Spear (2006) <sup>89</sup> | USA     | General hospital: total of 21 hospitals            | Multiple methods: Observational Interviews Survey | Observation: 11 nurses for complete shifts at 6 hospitals, mean length 9hr 51min; N=6 nurses (same) for interviews N=520 survey responses from staff within 48 units across 21 hospitals | None          | Primary aim              | No                             | Staff (nurses)              | No                                                              | Contributory factors elicited from interview and observational components of study only  | N=11 nurses involved in observations                  |
| Tucker et al (2008) <sup>90</sup>   | USA     | General hospital: 20                               | Multiple methods:                                 | 1732 failures collected from                                                                                                                                                             | None          | Primary aim              | No                             | Staff (staff in hospitals)  | No                                                              | Same                                                                                     | N/A                                                   |

| Study                                   | Country                                                       | Setting                                                                                            | Study method                                                                    | Study sample                         | Use of theory                                                          | Identification main aim? | Human factors expert involved? | Patients or Staff reporting                          | Contributory factor list fully developed before data collected? | Method for eliciting contributory factors (if different from study method)                                         | Further details about contributory factor elicitation                   |
|-----------------------------------------|---------------------------------------------------------------|----------------------------------------------------------------------------------------------------|---------------------------------------------------------------------------------|--------------------------------------|------------------------------------------------------------------------|--------------------------|--------------------------------|------------------------------------------------------|-----------------------------------------------------------------|--------------------------------------------------------------------------------------------------------------------|-------------------------------------------------------------------------|
|                                         |                                                               | acute care hospitals in the USA                                                                    | Observation Department 'discussion' groups (called safety communication forums) | 173 work areas across 20 hospitals   |                                                                        |                          |                                | performed the observation and the discussion groups) |                                                                 |                                                                                                                    |                                                                         |
| Valentin et al (2009) <sup>91</sup>     | Multinational data collected First author affiliation Austria | Intensive care: 113 intensive care units from 27 countries, focus on parenteral medication errors) | Multiple methods: Observation and survey                                        | 861 errors affecting 441 patients    | None                                                                   | Primary aim              | No                             | Staff                                                | Yes                                                             | The way in which contributory factors were elicited for inclusion on the incident reporting form was not specified | N/A                                                                     |
| Van Beuzekom et al (2007) <sup>92</sup> | The Netherlands                                               | Surgery & Intensive care<br><br>Operating rooms of two university                                  | Survey                                                                          | 330 questionnaire responses received | Broad: General failure types and structural systems failures mentioned | Primary aim              | No                             | Staff                                                | Yes                                                             | The survey was developed using qualitative interviews and validated by                                             | Development: 8 team members; validated: 10 members of supervising board |

| Study                                       | Country | Setting                                                                                                                        | Study method            | Study sample                                                                  | Use of theory                     | Identification main aim? | Human factors expert involved? | Patients or Staff reporting | Contributory factor list fully developed before data collected? | Method for eliciting contributory factors (if different from study method) | Further details about contributory factor elicitation |
|---------------------------------------------|---------|--------------------------------------------------------------------------------------------------------------------------------|-------------------------|-------------------------------------------------------------------------------|-----------------------------------|--------------------------|--------------------------------|-----------------------------|-----------------------------------------------------------------|----------------------------------------------------------------------------|-------------------------------------------------------|
|                                             |         | hospitals, and intensive care units of one university hospital and one teaching hospital.                                      |                         |                                                                               | (Reason, 1990)                    |                          |                                |                             |                                                                 | an external expert group                                                   |                                                       |
| Watt et al (2009) <sup>93</sup> , chapter 4 | UK      | General Hospital Patients and carers recruited from primary and secondary care in large metropolitan area and large rural area | Interview & focus group | 30 individual interviews<br>12 focus group discussions (total of 68 patients) | None                              | Secondary aim            | No                             | Patients                    | No                                                              | Same                                                                       | N/A                                                   |
| Wiegmann et al (2007) <sup>94</sup>         | USA     | Surgery: Cardiac surgical unit                                                                                                 | Observation             | 31 operations, 42 hours of observation; N=341 surgical                        | Broad: active vs. latent failures | Secondary aim            | Yes (observer had 10 hours)    | N/A                         | Yes                                                             | Based on previous framework: Human                                         | N/A                                                   |

| Study                           | Country                                                         | Setting                                                                                              | Study method | Study sample                                                                                          | Use of theory                                                 | Identification main aim? | Human factors expert involved?                                                                                           | Patients or Staff reporting | Contributory factor list fully developed before data collected? | Method for eliciting contributory factors (if different from study method)                        | Further details about contributory factor elicitation |
|---------------------------------|-----------------------------------------------------------------|------------------------------------------------------------------------------------------------------|--------------|-------------------------------------------------------------------------------------------------------|---------------------------------------------------------------|--------------------------|--------------------------------------------------------------------------------------------------------------------------|-----------------------------|-----------------------------------------------------------------|---------------------------------------------------------------------------------------------------|-------------------------------------------------------|
|                                 |                                                                 |                                                                                                      |              | flow disruptions identified and 155 technical operative errors                                        | mentioned . No references given                               |                          | didactic instruction on human factors, human error and systems safety from a senior human factors scientist – co-author) |                             |                                                                 | Factors analysis classification system (Elbardassi et al, 2001)                                   |                                                       |
| Wong et al (2006) <sup>95</sup> | North America (USA / Canada)<br>First author affiliation Canada | Surgery: Cardiac surgery units in 3 university affiliated teaching hospitals in two countries (USA / | Survey       | 1627 reports of precursor events gathered from a total of 464 major adult cardiac surgical procedures | Broad: Reason's Swiss cheese model referred to (Reason, 1990) | Primary aim              | No                                                                                                                       | Staff                       | Yes                                                             | The way in which contributory factors were elicited for inclusion in the survey was not specified | N/A                                                   |

| Study | Country | Setting | Study method | Study sample | Use of theory | Identification main aim? | Human factors expert involved? | Patients or Staff reporting | Contributory factor list fully developed before data collected? | Method for eliciting contributory factors (if different from study method) | Further details about contributory factor elicitation |
|-------|---------|---------|--------------|--------------|---------------|--------------------------|--------------------------------|-----------------------------|-----------------------------------------------------------------|----------------------------------------------------------------------------|-------------------------------------------------------|
|       |         | Canada) |              |              |               |                          |                                |                             |                                                                 |                                                                            |                                                       |



## Reference List

- (1) Abramson NS, Silvasy Wald K, Grenvik ANA, Robinson D, Snyder JV. Adverse occurrences in intensive care units. *JAMA* 1980;**244**:1582-1584.
- (2) Beckmann U, Gillies DM. Factors associated with reintubation in intensive care - An analysis of causes and outcomes. *CHEST* 2001;**120**:538-542.
- (3) Beckmann U, Baldwin I, Hart GK, Runciman WB. The Australian Incident Monitoring Study in Intensive Care: AIMS-ICU. An analysis of the first year of reporting. *Anaesth Intensive Care* 1996;**24**:329.
- (4) Beckmann U, West LF, Groombridge GJ, Baldwin I, Hart GK, Clayton DG et al. The Australian Incident Monitoring Study in Intensive Care: AIMS-ICU. The development and evaluation of an incident reporting system in intensive care. *Anaesth Intensive Care* 1996;**24**:314-319.
- (5) Buckley TA, Short TG, Rowbottom YM, Oh TE. Critical incident reporting in the intensive care unit. *Anaesthesia* 1997;**52**:403-409.
- (6) Busse DK, Wright DJ. Classification and analysis of incidents in complex medical environments. *Top Health Inf Manage* 2000;**20**:1-11.
- (7) Wright D, Mackenzie SJ, Buchan I, Cairns CS, Price LE. Critical Incidents in the Intensive Therapy Unit. *Lancet* 1991;**338(8768)**:676-678.
- (8) Callum JL, Kaplan HS, Merkley LL, Pinkerton PH, Fastman BR, Romans RA et al. Reporting of near-miss events for transfusion medicine: Improving transfusion safety. *Transfusion* 2001;**41**:1204-1211.
- (9) Chang S, Pool V, O'Connell K, Polder JA, Iskander J, Sweeney C et al. Preventable mix-ups of tuberculin and vaccines: Reports to the US vaccine and drug safety reporting systems. *Drug Saf* 2008;**31**:1027-1033.
- (10) Cote CJ, Notterman DA, Karl HW, Weinberg JA, McCloskey C. Adverse sedation events in pediatrics: A critical incident analysis of contributing factors. *Pediatrics* 2000;**105**:805-814.
- (11) Currie M. A prospective survey of anaesthetic critical events in a teaching hospital. *Anaesth Intensive Care* 1989;**17**:403-411.

- (12) Currie M, Pybus DA, Torda TA. A prospective survey of anaesthetic critical events. A report on a pilot study of 88 cases. *Anaesth Intensive Care* 1988;**16**:103-107.
- (13) Elnicki RA, Schmitt JP. Contribution of patient and hospital characteristics to adverse patient incidents. *Health Serv Res* 1980;**15**:397-414..
- (14) Frey B, Kehrer B, Losa M, Berweger L, Micallef J, Ebenberger M. Comprehensive critical incident monitoring in a neonatal-pediatric intensive care unit: experience with the system approach. *Intensive Care Med* 2000;**26**:69-74.
- (15) Galletly DC, Mushet NN. Anaesthesia system errors. *Anaesth Intensive Care* 1991;**19**:66-73.
- (16) Graf J, von den Driesch A, Koch KC, Janssens U. Identification and characterization of errors and incidents in a medical intensive care unit. *Acta Anaesthesiol Scand* 2005;**49**:930-939.
- (17) Harding L, Petrick T. Nursing student medication errors: A retrospective review. *J Nurs Educ* 2008;**47**:43-47.
- (18) Inoue K, Koizumi A. Application of human reliability analysis to nursing errors in hospitals. *Risk Anal* 2004;**24**:1459-1473.
- (19) Kaplan HS, Battles JB, van der Schaaf TW, Shea CE, Mercer SQ. Identification and classification of the causes of events in transfusion medicine. *Transfusion* 1998;**38**:1071-1081.
- (20) Khan FA, Hoda MQ. A prospective survey of intra-operative critical incidents in a teaching hospital in a developing country. *Anaesthesia* 2001;**56**:177-182.
- (21) Kusumaphanyo C, Charuluxananan S, Sriramatr D, Pulnitiporn A, Sriraj W. The Thai Anesthesia Incident Monitoring Study (Thai AIMS) of anesthetic equipment failure/malfunction: an analysis of 1996 incident reports. *J Med Assoc Thai* 2009;**92**:1442-1449.
- (22) Klanarong S, Chau-in W, Pulnitiporn A, Pengpol W. The Thai Anesthesia Incidents Study (THAI Study) of anesthetic equipment failure / malfunction: a qualitative analysis for risk factors. *J Med Assoc Thai* 2005;**88**(suppl 7):s134-s140.
- (23) Sintavanuruk K, Rodanant O, Kositanurit I, Akavipat P, Pulnitiporn A, Sriraj W. The thai anesthesia incident monitoring study (Thai AIMS) of endobronchial intubation: An analysis of 1996 incident reports. *J Med Assoc Thai* 2008;**91**:1854-1861.

- (24) Charuluxananan S, Suraseranivongse S, Jantorn P, Sriraj W, Chanchayanon T, Tanudsintum S et al. Multicentered study of model of anesthesia related adverse events in Thailand by incident report (The Thai Anesthesia Incidents Monitoring Study): results. *J Med Assoc Thai* 2008;**91**:1011-1019.
- (25) Lundy D, Laspina S, Kaplan H, Fastman BR, Lawlor E. Seven hundred and fifty-nine (759) chances to learn: a 3-year pilot project to analyse transfusion-related near-miss events in the Republic of Ireland. *Vox Sang* 2007;**92**:233-241.
- (26) Morita K. Evaluation of improved safety management program for outpatient drug dispensing in terms of effect on potential adverse drug events. *Kurume Med J* 2004;**51**:151-157.
- (27) Nast PA, Avidan M, Harris CB, Krauss MJ, Jacobsohn E, Petlin A et al. Reporting and classification of patient safety events in a Cardiothoracic Intensive Care unit and cardiothoracic postoperative care unit. *J Thorac Cardiovasc Surg* 2005;**130**:1137-1143.
- (28) Needham DM, Thompson DA, Holzmueller CG, Dorman T, Lubomski LH, Wu AW et al. A system factors analysis of airway events from the Intensive Care Unit Safety Reporting System (ICUSRS). *Crit Care Med* 2004;**32**:2227-2233.
- (29) Needham DM, Sinopoli DJ, Thompson DA, Holzmueller CG, Dorman T, Lubomski LH et al. A system factors analysis of "line, tube, and drain" incidents in the intensive care unit. *Crit Care Med* 2005;**33**:1701-1707.
- (30) Holzmueller CG, Pronovost PJ, Dickman F, Thompson DA, Wu AW, Lubomski LH et al. Creating the Web-based intensive care unit safety reporting system. *J Am Med Inform Assoc* 2005;**12**:130-139.
- (31) Sinopoli DJ, Needham DM, Thompson DA, Holzmueller CG, Dorman T, Lubomski LH et al. Intensive care unit safety incidents for medical versus surgical patients: A prospective multicenter study. *J Crit Care* 2007;**22**:177-183.
- (32) Nuckols TK, Bell DS, Paddock SM, Hilborne LH. Contributing factors identified by hospital incident report narratives. *Qual Saf Health Care* 2008;**17**:368-372.
- (33) Nuckols TK, Bell DS, Paddock SM, Hilborne LH. Comparing process- and outcome-oriented approaches to voluntary incident reporting in two hospitals. *Jt Comm J Qual Patient Saf* 2009;**35**:139-145.

- (34) Short TG, O'Regan A, Jayasuriya JP, Rowbottom M, Buckley TA, Oh TE. Improvements in anaesthetic care resulting from a critical incident report programme. *Anaesthesia* 1996;**51**:615-621.
- (35) Skapik JL, Pronovost PJ, Miller MR, Thompson DA, Wu AW. Pediatric safety incidents from an intensive care reporting system. *J Patient Saf* 2009;**5**:95-101.
- (36) Suresh G, Horbar JD, Plsek P, Gray J, Edwards WH, Shiono PH et al. Voluntary anonymous reporting of medical errors for neonatal intensive care. *Pediatrics* 2004;**113**:1609-1618.
- (37) Tuttle D, Holloway R, Baird T, Sheehan B, Skelton WK. Electronic reporting to improve patient safety. *Qual Saf Health Care* 2004;**13**:281-286.
- (38) Williamson JA, Webb RK, Sellen A, Runciman WB, Van der Walt JH. The Australian Incident Monitoring Study. Human failure: an analysis of 2000 incident reports. *Anaesth Intensive Care* 1993;**21**:678-683.
- (39) Wolf ZR, Hicks R, Serembus JF. Characteristics of medication errors made by students during the administration phase: A descriptive study. *J Prof Nurs* 2006;**22**:39-51.
- (40) Ahmad I, Thompson A, Frawley M, Hu P, Heffernan A, Power C. Five-year experience of critical incidents associated with patient-controlled analgesia in an Irish University Hospital. *Ir J Med Sci* 2010;**179**:393-397.
- (41) Alfredsdottir H, Bjornsdottir K. Nursing and patient safety in the operating room. *J Adv Nurs* 2008;**61**:29-37.
- (42) Anoosheh M, Ahmadi F, Faghihzadeh S, Vaismoradi M. Causes and management of nursing practice errors: a questionnaire survey of hospital nurses in Iran. *Int Nurs Rev* 2008;**55**:288-295.
- (43) Barach P, Johnson JK, Ahmad A, Galvan C, Bogner A, Duncan R et al. A prospective observational study of human factors, adverse events, and patient outcomes in surgery for pediatric cardiac disease. *J Thorac Cardiovasc Surg* 2008;**136**
- (44) Beckmann U, Bohringer C, Carless R, Gillies DM, Runciman WB, Wu AW et al. Evaluation of two methods for quality improvement in intensive care: Facilitated incident monitoring and retrospective medical chart review. *Crit Care Med* 2003;**31**:1006-1011.
- (45) Beso A, Franklin BD, Barber N. The frequency and potential causes of dispensing errors in a hospital pharmacy. *Pharm World Sci* 2005;**27**:182-190

- (46) Blike GT, Christoffersen K, Cravero JP, Andeweg SK, Jensen J. A method for measuring system safety and latent errors associated with pediatric procedural sedation. *Anesth Analg* 2005;**101**:48-58.
- (47) Catchpole KR, Godden PJ, Giddings AE, et al. Identifying and reducing errors in the operating theatre. Patient safety research programme final report PS012. 2005.
- (48) Catchpole KR, Giddings AEB, de Leval MR, Peek GJ, Godden PJ, Utlely M et al. Identification of systems failures in successful paediatric cardiac surgery. *Ergonomics* 2006; 2006;**49**:567-588.
- (49) Catchpole KR, Giddings AEB, Wilkinson M, Hirst G, Dale T, de Leval MR. Improving patient safety by identifying latent failures in successful operations. *Surgery* 2007;**142**:102-110.
- (50) Chianca TC. Nursing faults in the recovery period of surgical patients. *Rev Lat Am Enfermagem* 2006;**14**:879-886.
- (51) Christian CK, Gustafson ML, Roth EM, Sheridan TB, Gandhi TK, Dwyer K et al. A prospective study of patient safety in the operating room. *Surgery* 2006;**139**:159-173.
- (52) Coombes ID, Stowasser DA, Coombes JA, Mitchell C. Why do interns make prescribing errors? A qualitative study. *M J Aust* 2008;**188**:89-94.
- (53) Cooper JB, Newbower RS, Kitz RJ. An analysis of major errors and equipment failures in anesthesia management: considerations for prevention and detection. *Anesthesiology* 1984;**60**:34-42.
- (54) Cronin CM. Five years of learning from analysis of clinical occurrences in pediatric care using the London Protocol. *Healthc Q* 2006;**9**:Spec No:16-21.
- (55) Cullen DJ, Sweitzer BJ, Bates DW, Burdick E, Edmondson A, Leape LL. Preventable adverse drug events in hospitalized patients: A comparative study in intensive care and general care units. *Crit Care Med* 1997;**25**:1289-1297.
- (56) Davis P, Lay-Yee R, Briant R, Schug S, Scott A, Johnson S et al. Adverse events in New Zealand public hospitals: Principal findings from a national survey. Occasional paper number 3. Wellington, New Zealand: Ministry of Health 2001.

- (57) Davis P, Lay-Yee R, Briant R, Scott A. Preventable in-hospital medical injury under the "no fault" system in New Zealand. *Qual Saf Health Care* 2003;**12**:251-256.
- (58) de Leval MR, Carthey J, Wright DJ, Farewell VT, Reason JT. Human factors and cardiac surgery: A multicenter study. *J Thorac Cardiovasc Surg* 2000;**119**:661-670.
- (59) Dean B, Schachter M, Vincent C, Barber N. Causes of prescribing errors in hospital inpatients: a prospective study. *Lancet* 2002;**359(9315)**:1373-1378.
- (60) Dornan T, Ashcroft D, Healthfield H, Lewis P, Miles J, Taylor D et al. An in depth investigation into causes of prescribing errors by foundation trainees in relation to their medical education. EQUIP study. Hope Hospital (University of Manchester Medical School Teaching Hospital) 2009.
- (61) ElBardissi AW, Wiegmann DA, Dearani JA, Daly RC, Sundt TM. Application of the human factors analysis and classification system methodology to the cardiovascular surgery operating room. *Ann Thorac Surg* 2007;**83**:1412-1419.
- (62) Fabri PJ, Zayas-Castro JL. Human error, not communication and systems, underlies surgical complications. *Surgery* 2008;**144**:557-565.
- (63) Forster AJ, Fung I, Caughey S, Oppenheimer L, Beach C, Shojania KG et al. Adverse Events Detected by Clinical Surveillance on an Obstetric Service. *Obstet Gynecol* 2006;**108**:1073-1083.
- (64) Galvan C, Bacha EA, Mohr J, Barach P. A human factors approach to understanding patient safety during pediatric cardiac surgery. *Prog Pediatr Cardiol* 2005;**20**:13-20.
- (65) Gawande AA, Zinner MJ, Studdert DM, Brennan TA. Analysis of errors reported by surgeons at three teaching hospitals. *Surgery* 2003;**133**:614-621.
- (66) Giraud T, Dhainaut JF, Vaxelaire JF, Joseph T, Journois D, Bleichner G et al. Iatrogenic Complications in Adult Intensive-Care Units - A Prospective 2-Center Study. *Crit Care Med* 1993;**21**:40-51.
- (67) Graber ML, Franklin N, Gordon R. Diagnostic Error in Internal Medicine. *Arch Intern Med* 2005;**165**:1493-1499.
- (68) Hamman WR, Beaudin-Seiler BM, Beaubien JM, Gullickson AM, Gross AC, Orizondo-Korotko K et al. Using in situ simulation to identify and resolve latent environmental threats to patient safety: case study involving a labor and delivery ward. *J Patient Saf* 2009;**5**:184-187.

- (69) Horwitz LL, Meredith T, Schuur JD, Shah NR, Kulkarni RG, Jenq GY. Dropping the Baton: A Qualitative Analysis of Failures During the Transition From Emergency Department to Inpatient Care. *Ann Emerg Med* 2009;**53**:701-710.
- (70) Itoh K, Andersen HB. Causes of medical errors as perceived by patients and healthcare staff. In: Aven T, Vinnem JE, eds. *Risk, Reliability and Societal Safety*. Taylor & Francis 2007:179-185.
- (71) Kopp BJ, Erstad BL, Allen ME, Theodorou AA, Priestley G. Medication errors and adverse drug events in an intensive care unit: Direct observation approach for detection. *Crit Care Med* 2006;**34**:415-425.
- (72) Leape LL, Bates DW, Cullen DJ, Cooper J, Demonaco HJ, Gallivan T et al. Systems Analysis of Adverse Drug Events. *JAMA* 1995;**274**:35-43.
- (73) Lesar TS, Briceland L, Stein DS. Factors related to errors in medication prescribing. *JAMA* 1997;**277**:312-317.
- (74) Meurier CE, Vincent CA, Parmar DG. Learning from errors in nursing practice. *J Adv Nurs* 1997;**26**:111-119.
- (75) Neale G, Woloshynowych M, Vincent C. Exploring the causes of adverse events in NHS hospital practice. *J R Soc Med* 2001;**94**:322-330.
- (76) Parker SEH, Laviana AA, Wadhera RK, Wiegmann DA, Sundt TM. Development and Evaluation of an Observational Tool for Assessing Surgical Flow Disruptions and Their Impact on Surgical Performance. *World J Surg* 2010;**34**:353-361.
- (77) Pearse RM, Dana EC, Lanigan CJ, Pook JAR. Organisational failures in urgent and emergency surgery - A potential peri-operative risk factor. *Anaesthesia* 2001;**56**:684-689.
- (78) Proctor ML, Pastore J, Gerstle JT, Langer JC. Incidence of medical error and adverse outcomes on a pediatric general surgery service. *J Pediatr Surg* 2003;**38**:1361-1365.
- (79) Rothschild JM, Landrigan CP, Cronin JW, Kaushal R, Lockley SW, Burdick E et al. The Critical Care Safety Study: The incidence and nature of adverse events and serious medical errors in intensive care. *Crit Care Med* 2005;**33**:1694-1700.
- (80) Sanghera IS, Franklin BD, Dhillon S. The attitudes and beliefs of healthcare professionals on the causes and reporting of medication errors in a UK Intensive care unit. *Anaesthesia* 2007;**62**:53-61.

- (81) Silen-Lipponen M, Tossavainen K, Turunen H, Smith A. Potential errors and their prevention in operating room teamwork as experienced by Finnish, British and American nurses. *Int J Nurs Pract* 2005;**11**:21-32.
- (82) Singh H, Thomas EJ, Wilson L, Kelly PA, Pietz K, Elkeeb D et al. Errors of Diagnosis in Pediatric Practice: A Multisite Survey. *Pediatrics* 2010;**126**:70-79.
- (83) Skibinski KA, White BA, Lin LK, Dong YP, Wu WT. Effects of technological interventions on the safety of a medication-use system. *Am J Health Syst Pharm* 2007;**64**:90-96.
- (84) Smits M, Groenewegen PP, Timmermans DRM, van der Wal G, Wagner C. The nature and causes of unintended events reported at ten emergency departments. *BMC Emerg Med* 2009;**9**:16.
- (85) Smits M, Zegers M, Groenewegen PP, Timmermans DR, Zwaan L, van der wal G, Wagner C. Exploring the causes of adverse events in hospitals and potential prevention strategies. *Qual Saf Health Care* 2010; Feb 2010 Epub ahead of print.
- (86) Sutcliffe KM, Lewton E, Rosenthal MM. Communication failures: An insidious contributor to medical mishaps. *Acad Med* 2004;**79**:186-194
- (87) Tang FI, Sheu SJ, Yu S, Wei IL, Chen CH. Nurses relate the contributing factors involved in medication errors. *J Clin Nurs* 2007;**16**:447-457.
- (88) Tissot E, Cornette C, Limat S, Mourand J-L, Becker M, Etievent J-P et al. Observational study of potential risk factors of medication administration errors. *Pharm World Sci* 2003;**25**:264-268.
- (89) Tucker AL, Spear SJ. Operational failures and interruptions in hospital nursing. *Health Serv Res* 2006;**41**:643-662.
- (90) Tucker AL, Singer SJ, Hayes JE, Falwell A. Front-line staff perspectives on opportunities for improving the safety and efficiency of hospital work systems. *Health Serv Res* 2008;**43**:1807-1829.
- (91) Valentin A, Capuzzo M, Guidet B, Moreno R, Metnitz B, Bauer P et al. Errors in administration of parenteral drugs in intensive care units: multinational prospective study. *BMJ* 2009;**338**:b814.
- (92) van Beuzekom M, Akerboom SP, Boer F. Assessing system failures in operating rooms and intensive care units. *Qual Saf Health Care* 2007;**16**:45-50.



- (93) Watt I, Birks Y, Entwistle V, Gilbody S, Hall J, Mansell P et al. A review of strategies to promote patient involvement, a study to explore patient's views and attitudes and a pilot study to evaluate the acceptability of selected patient involvement strategies. University of York 2009.
- (94) Wiegmann DA, ElBardissi AW, Dearani JA, Daly RC, Sundt TM. Disruptions in surgical flow and their relationship to surgical errors: An exploratory investigation. *Surgery* 2007;**142**:658-665.
- (95) Wong DR, Salm TJV, Ali IS, Agnihotri AK, Bohmer RMJ, Torchiana DF. Prospective assessment of intraoperative precursor events during cardiac surgery. *Eur J Cardiothorac Surg* 2006;**29**:447-455.
